# Supplementary material for: A Recurrent STAT5BN642H Driver Mutation in Feline Alimentary T Cell Lymphoma
Source: MDPI journal article supplement (doi:10.3390/cancers13205238), 2021-10-19
Supplement: s1 [file s1]

# Supplementary Material: A Recurrent *STAT5B*<sup>N642H</sup> Driver Mutation in Feline Alimentary T Cell Lymphoma

Matthias Kieslinger, Alexander Swoboda, Nina Kramer, Patricia Freund, Barbara Pratscher, Heidi A. Neubauer, Ralf Steinborn, Birgitt Wolfesberger, Andrea Fuchs-Baumgartinger, Richard Moriggl and Iwan A. Burgener

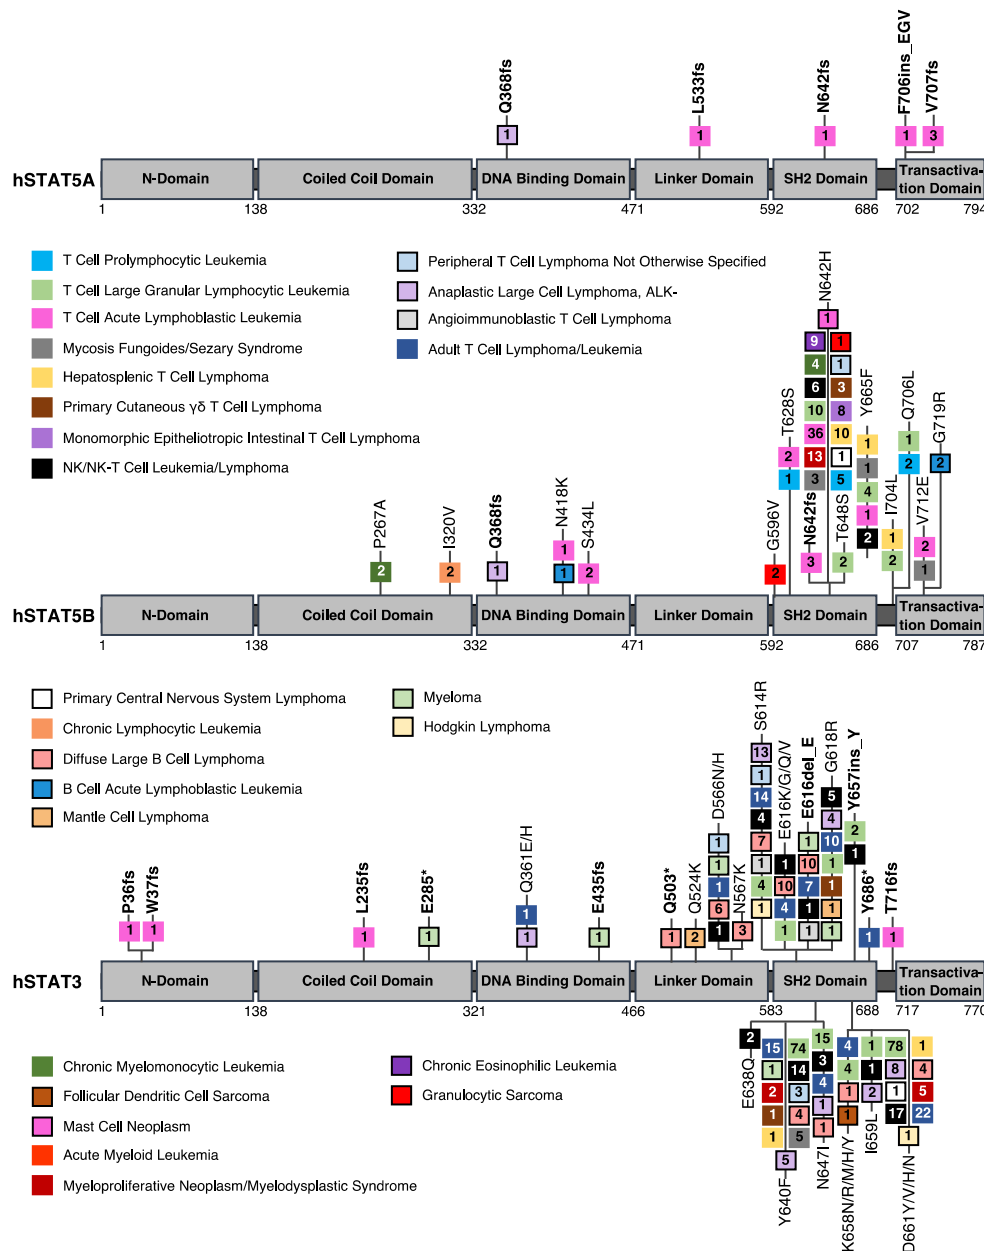

**Figure S1.** Depiction of somatic mutations detected in human STAT5A, STAT5B and STAT3 in patients with hematopoietic cancers. Individual missense mutations found in at least two patients, as well as all reported nonsense and frameshift mutations (bold), are depicted. Numbers in each box represent the number of cases reported for each mutation. Data were mined from the Catalogue of Somatic Mutations in Cancer (COSMIC) database. SH2, Src homology 2.

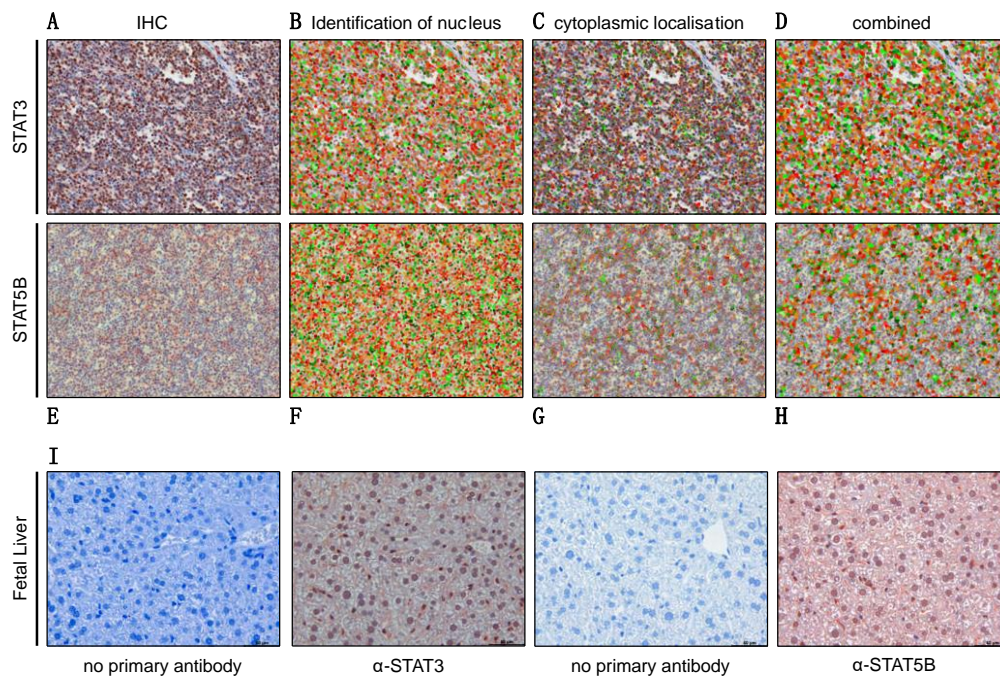

**Figure S2.** Determination of protein localisation by image analysis software and antibody control. Tissue sections of EATL type II were stained by immunohistochemistry for STAT3 (A-D) or STAT5B (E-H) and counterstained by haematoxylin to visualise nuclei (A, E). Nuclei were identified by computer-based image analysis (HistoQuest 6.0; TissueGnostics) based on haematoxylin (B, F). Different colours were used to distinguish between different nuclei. Cytoplasm was determined in a second step, and overlaid with colour intensity information from immunohistochemistry (C, G). Colours in the middle right panel do not indicate staining intensity, but represent the cytoplasm of individual cells positive for STAT3 or STAT5B. Nuclei were overlaid with data from immunohistochemistry as for cytoplasm (D, H) to quantify the respective protein. (I) Tissue sections of fetal liver were stained with the indicated antibodies or for control without primary antibody. The localisation was used for normalisation of Fig.3C and D.

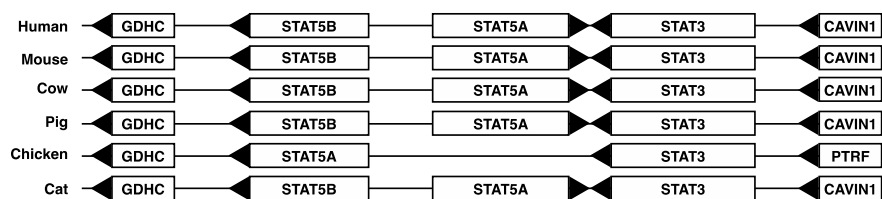

**Figure S3.** Comparison of genes in the Stat3/5 locus in various species. Black triangles indicate the direction of transcription, flanking genes are shown. (Co-ordinates: Human: Chr. 17 42,199,177-42,388,373; Mouse: Chr. 11 100,671,557-100,830,366 ; Cow: Chr. 19 42,319,170-42,491,771; Pig: Chr. 12 20,407,233-20,574,288 ; Chicken: Chr. 27 7,694,496-7,727,343; Cat: Chr. E1 42,838,788-42,968,081; all co-ordinates span the STAT genes from 5' to 3', co-ordinates are derived from ENSEMBL).

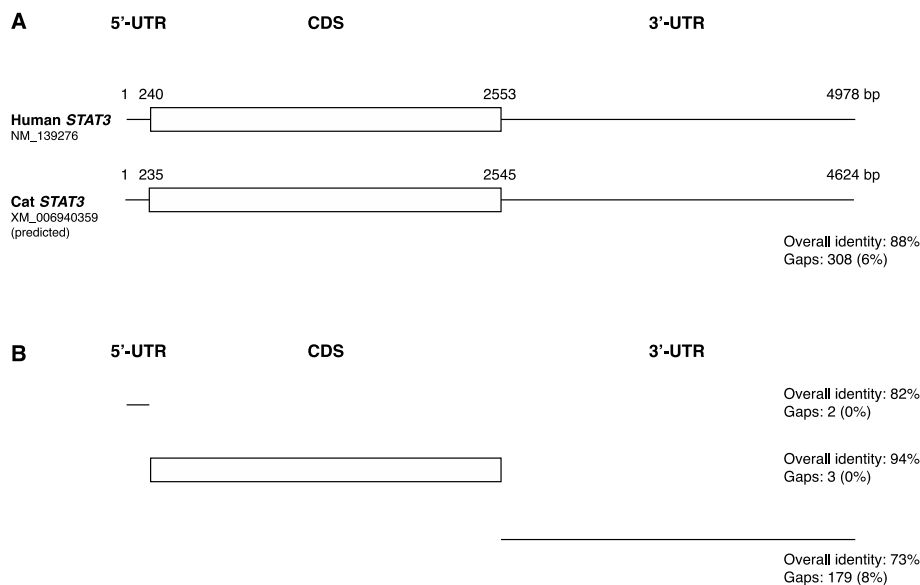

**Figure S4.** Comparison of conserved regions between human and feline *STAT3*. (A) Schematic representation of human *STAT3* mRNA, with untranslated regions (UTR) depicted as lines and the coding sequence (CDS) as a box. The total length as well as the nucleotide positions of the boundaries are shown above. Overall identity and homology gaps are indicated as well as the NCBI sequence identifiers. (B) Overall identity and homology gaps are shown for 5'-UTR, coding sequence and 3'-UTR.

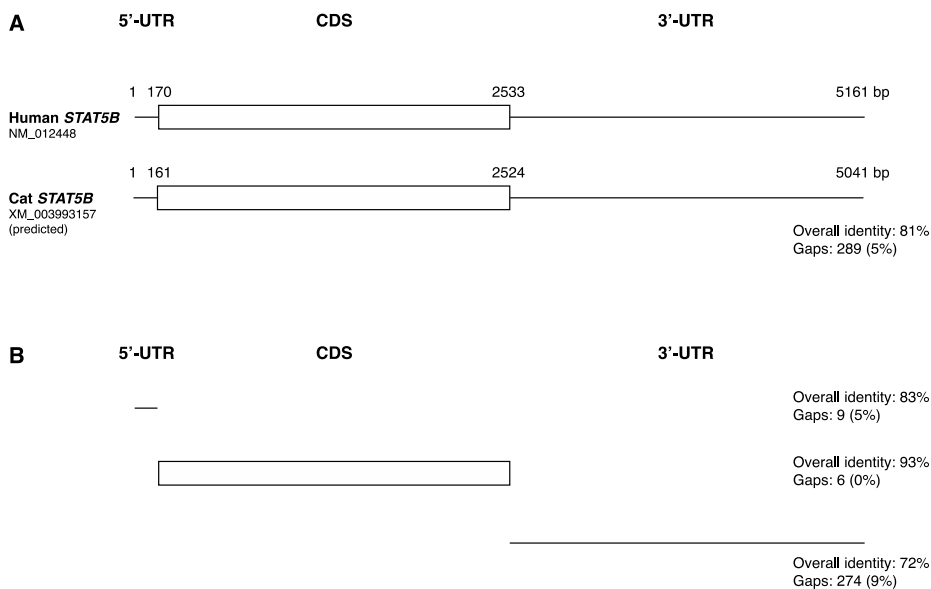

**Figure S5.** Comparison of conserved regions between human and feline *STAT5B*. (A) Schematic representation of human *STAT5B* mRNA, with UTR regions depicted as lines and the coding sequence as a box. The total length as well as the nucleotide positions of the boundaries are shown above. Overall identity and homology gaps are indicated as well as the NCBI sequence identifiers. (B) Overall identity and homology gaps are shown for 5'-UTR, coding sequence and 3'-UTR.

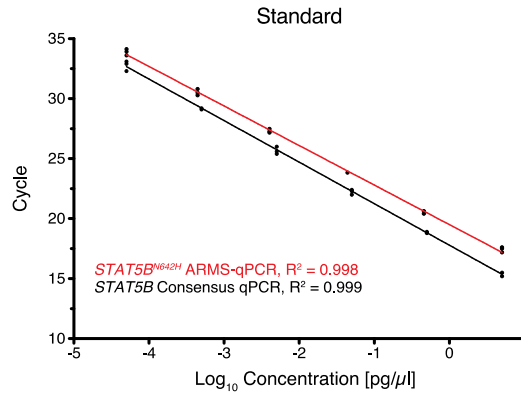

**Figure S6.** Standard calibration curves for primer pairs detecting the *wild-type* (consensus) sequence of *STAT5B*<sup>N642</sup> and the mutant (ARMS) sequence of *STAT5B*<sup>N642H</sup>. Standard calibration curves were generated by plotting the *C<sub>q</sub>* values versus the decadic logarithm of diluted standard for *wild-type* and mutant DNA copy number. Amplification efficiency was calculated from the slope of the curve. *n* = 3.

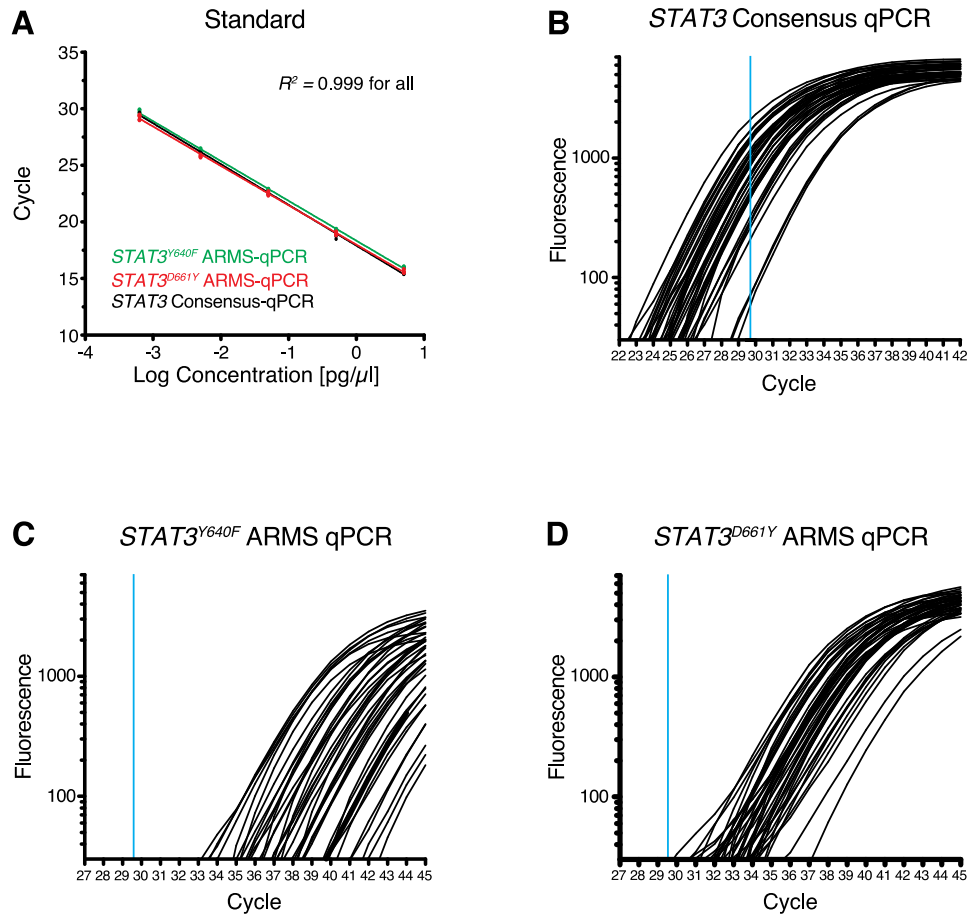

**Figure S7.** Analysis of known activating mutations of *STAT3* in feline alimentary tumour cells by ARMS-qPCR. (A) Standard calibration curves for primer pairs detecting the *wild-type* (consensus) sequence of *STAT3*<sup>Y640</sup> and *STAT3*<sup>D661Y</sup> on exon 21, the mutant (ARMS) sequence of *STAT3*<sup>Y640F</sup> and the mutant (ARMS) sequence of *STAT3*<sup>D661Y</sup>. Standard calibration curves were generated by plotting the *C<sub>q</sub>* values versus the decadic logarithm of diluted standard for *wild-type* and mutant DNA copy number. Amplification efficiency was calculated from the slope of the curve. *n* = 3. (B-D) Amplification plot obtained using the *wild-type* (consensus) primers (B), the *STAT3*<sup>Y640F</sup> mutant-specific (ARMS) primers (C) and the *STAT3*<sup>D661Y</sup> mutant-specific (ARMS) primers (D) in qPCR with genomic DNA of the alimentary lymphoma samples indicated in Fig. 5C. Fluorescence is presented as fluorescence intensity over background, and B-D have been corrected for the standard curves in A. *n* = 3.

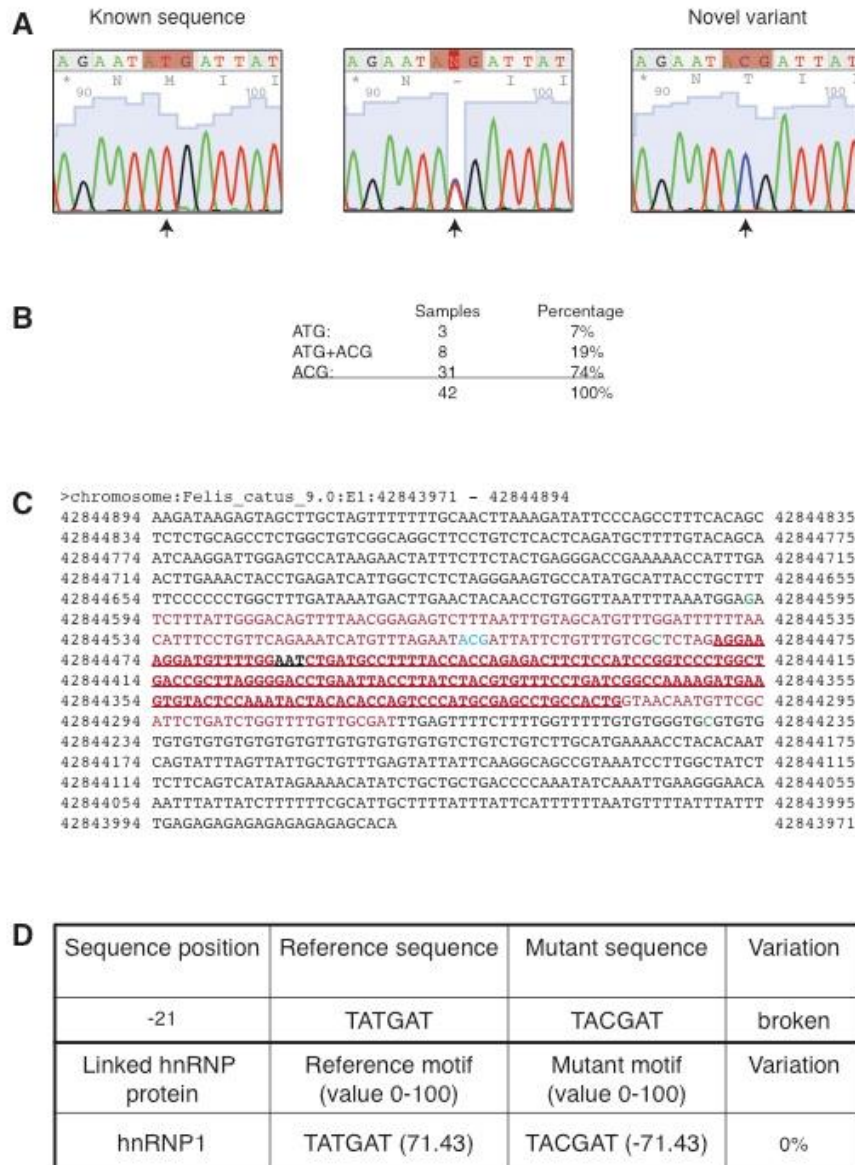

**Figure S8.** Identification of a novel polymorphism in a potential splice site of feline *STAT5B*. (A) Results of sequencing of *intron 16* of feline *STAT5B*. Primers as depicted in Fig. 4 were used, covering part of the intron preceding *exon 17*. Pictograms show the results from three different individuals harbouring the known sequence as deposited in the feline genome database (left panel), and a novel polymorphism in the heterozygous (middle panel) and homozygous state (right panel). (B) Frequency of the polymorphism among the tested samples. The number and percentage of each state of the polymorphism among the cohort of feline patients is shown. (C) Schematic depiction of the genomic locus surrounding *exon 17* of feline *STAT5B*. *Exon 17* is underlined and bold, the sequence used for analysis is shown in red. Three nucleotides comprising the novel polymorphism are given in blue, known polymorphisms in green, and the triplet encoding for N642 in black. (D) Analysis of the novel polymorphism by functional prediction software (Splicing Finder, INSERM). The position of the polymorphism is shown with respect to the beginning of the following exon (sequence position), the sequence is shown (reference sequence), and the newly identified SNP (mutant sequence). hnRNP1 is identified as a binding protein (linked hnRNP protein), an arbitrary binding value to the cognate sequence (reference motif; 71.43) and its predicted loss in the new polymorphism (mutant motif; -71.43).

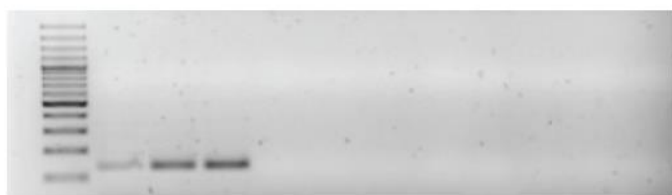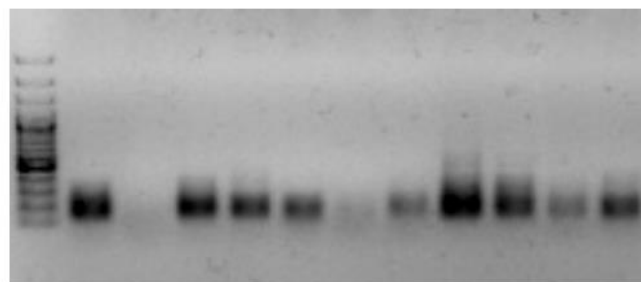

**Figure S9.** Original Agarose Gels.



**Table S1.** Details of feline lymphoma sample cohort.

| WHO 2008<br>CLASSIFICATION | SEX | NEUTER<br>STATUS | AGE | BREED              | MITOTIC<br>COUNT |
|----------------------------|-----|------------------|-----|--------------------|------------------|
| ALCL                       | f   | y                | 23  | European Shorthair | 2                |
| EATL I                     | f   | y                | 15  | European Shorthair | 82               |
| EATL I                     | f   | y                | 16  | European Shorthair | 91               |
| EATL I                     | f   | y                | 16  | European Shorthair | 68               |
| EATL I                     | m   | y                | 11  | European Shorthair | 94               |
| EATL I                     | f   | y                | 16  | European Shorthair | 120              |
| EATL I                     | f   | y                | 11  | European Shorthair | 17               |
| EATL I                     | f   | y                | 14  | European Shorthair | 13               |
| EATL I                     | m   | y                | 13  | European Shorthair | 57               |
| EATL I                     | f   | y                | 22  | European Shorthair | 80               |
| EATL I                     | m   | y                | 14  | Unknown            | 50               |
| EATL I                     | f   | y                | 12  | European Shorthair | 32               |
| EATL I                     | m   | y                | 22  | European Shorthair | 24               |
| EATL I                     | m   | y                | 12  | European Shorthair | 1                |
| EATL I                     | m   | y                | 15  | European Shorthair | 1                |
| EATL I                     | f   | y                | 12  | European Shorthair | 70               |
| EATL II                    | m   | y                | 14  | European Shorthair | 1                |
| EATL II                    | m   | y                | 19  | European Shorthair | 10               |
| EATL II                    | m   | y                | 12  | Brit. Longhair     | 0                |
| EATL II                    | m   | y                | 18  | European Shorthair | 0                |
| EATL II                    | f   | y                | 16  | Brit. Longhair     | 2                |
| EATL II                    | f   | y                | 21  | European Shorthair | 7                |
| EATL II                    | f   | y                | 20  | European Shorthair | 0                |
| EATL II                    | m   | y                | 16  | European Shorthair | 1                |
| EATL II                    | f   | y                | 17  | European Shorthair | 0                |
| EATL II                    | f   | y                | 9   | Unknown            | 1                |
| EATL II                    | m   | y                | 24  | European Shorthair | 0                |
| EATL II                    | m   | y                | 6   | Brit. Longhair     | 0                |
| EATL II                    | f   | y                | 21  | Unknown            | 0                |
| EATL II                    | f   | y                | 14  | European Shorthair | 0                |
| EATL II                    | f   | y                | 22  | European Shorthair | 0                |
| EATL II                    | m   | y                | 26  | European Shorthair | 1                |
| EATL II                    | m   | y                | 15  | European Shorthair | 0                |
| PTCL                       | m   | y                | 23  | European Shorthair | 3                |
| PTCL                       | m   | y                | 19  | European Shorthair | 113              |
| PTCL                       | f   | y                | 16  | European Shorthair | 1                |
| PTCL                       | m   | y                | 13  | European Shorthair | 121              |
| PTCL                       | f   | y                | 14  | European Shorthair | 108              |
| PTCL                       | f   | y                | 14  | European Shorthair | 87               |
| PTCL                       | m   | y                | 8   | Maine Coon         | 117              |
| PTCL                       | f   | y                | 13  | European Shorthair | 123              |
| T                          | f   | y                | 8   | European Shorthair | 47               |

**Table S2.** Oligonucleotides for PCR, qPCR and ARMS-qPCR assays.

**PCR**

| Primer name                 | Primer sequence (5' -> 3')  | Length [bp] | T <sub>m</sub> [°C] | Amplicon length [bp] |
|-----------------------------|-----------------------------|-------------|---------------------|----------------------|
| <i>STAT3_fw</i>             | CCT TCC CAT ATC CGA TGA CA  | 20          | 64.6                |                      |
| <i>STAT3_rev</i>            | CCA ACG TGG AAA ATC AAC AA  | 20          | 63.3                | 255                  |
| <i>STAT5B_fw</i>            | CCC CTG GCT TTG ATA AAT GA  | 20          | 63.6                |                      |
| <i>STAT5B_rev</i>           | CGC AAC AAA ACC AGA TCA GA  | 20          | 63.8                | 378                  |
| <i>FeLV_U3_exo_fw</i>       | AAC AGC AGA AGT TTC AAG GCC | 21          | 64.4                |                      |
| <i>FeLV_U3_exo_rev</i>      | TTA TAG CAG AAA GCG CGC G   | 19          | 66.2                | 131                  |
| <i>FeLV_U3_exo/endo_fw</i>  | CAG TGG TGC CAT TTC ACA AG  | 20          | 64.2                |                      |
| <i>FeLV_U3_exo/endo_rev</i> | AGC CTG GAG ACT GCT GGT AG  | 20          | 63.6                | 190                  |

**qPCR and ARMS-qPCR**

| Oligonucleotide name                  | Primer or probe sequence (5' -> 3')                 | Length [bp] | T <sub>m</sub> [°C] | Amplicon length [bp] |
|---------------------------------------|-----------------------------------------------------|-------------|---------------------|----------------------|
| <i>qSTAT5B_fw-consensus</i>           | TGC CTT TTA CCA CCA GAG ACT TC                      | 23          | 56.9                | 72                   |
| <i>qSTAT5B_rev-consensus/ARMS</i>     | AGA TAA GGT AAT TCA GGT CCC CTA AG                  | 26          | 55.5                |                      |
| <i>qSTAT5B_fw-ARMS c. 1924A&gt;C</i>  | GAG GAA AGG ATG TTT T <u>C</u> G <u>C</u> A         | 20          | 53.2                | 97                   |
| <i>qSTAT5B Hydrolysis probe (FAM)</i> | FAM- CAT CCG GTC -ZEN- CCT GGC TGA CCG -IABkFQ      | 21          | 64.7                |                      |
| <i>qSTAT3_fw-consensus</i>            | CAA GCA GCA GCT GAA CAA CA                          | 20          | 56.4                | 125                  |
| <i>qSTAT3_rev-consensus/ARMS</i>      | ACG CCT CCT CCT TAG GAA TG                          | 20          | 56.4                |                      |
| <i>qSTAT3_fw-ARMS c. 1919A&gt;T</i>   | CCA GTC CGT GGA ACC <u>t</u> TT T                   | 19          | 55.2                | 146                  |
| <i>qSTAT3_fw-ARMS c. 1981G&gt;T</i>   | ATC ATG GGC TAT AAG ATC <u>A</u> G TA               | 23          | 53.1                | 88                   |
| <i>qSTAT3 Hydrolysis probe (FAM)</i>  | FAM- CC AGC GGA G -ZEN- A CAC GAG GAT GTT G -IABkFQ | 23          | 61.8                |                      |

T<sub>m</sub>: melting temperature of NetPrimer software ([www.premierbiosoft.com/netprimer/](http://www.premierbiosoft.com/netprimer/))

Small letter in sequence of ARMS primer: mismatch with both alleles of the bi-allelic SNP site artificially introduced to enhance sequence discrimination

FAM: 6-carboxyfluorescein; ZEN™ internal quencher, IABkFQ: Iowa Black™ fluorescent quencher



**Supplementary Data:** Template dsDNA fragments for ARMS qPCR (based on assembly Felis\_catus\_9.0).

*STAT3* signal transducer and activator of transcription 3 [ *Felis catus* (domestic cat)], Gene ID: 101095698, updated on 24-Jun-2020 (based on assembly Felis\_catus\_9.0)

```
> feline STAT3 DNA (wild type) - chrE1:42942211 - 42942599
GAAAAATAAA TCAGGTAGTT TTCTCTAAGA TTACCTGGCC ATTATCCTCC 50
CTTCCCATAT CCGATGACAG GCAAGACCCA GATCCAGTCC GTGGAACCAT 100
ATACCAAGCA GCAGCTGAAC AACATGTCGT TTGCTGAAAT CATCATGGGC 150
TATAAGATCA TGGATGCTAC CAACATCCTC GTGTCTCCGC TGGTTTATCT 200
CTACCCGGAC ATTCCTAAGG AGGAGGCGTT TGGAAAGTAT TGTCGACCAG 250
AAAGCCAGGA GCATCCTGAA GCTGACCCAG GTAGTTGTTG ATTTTCCACG 300
TTGGGCACTT TTTCTGGGAA AAAATGGGAA ATTGCAGGAT TCTTGGAGGA 350
TAGGTAGGTC ACTGCCCAA GAGCCTGGTG ACCTTTATT 389
```

```
> feline STAT3 DNA (incl. SNPs)- chrE1:42942211 - 42942599
GAAAAATAAA TCAGGTAGTT TTCTCTAAGA TTACCTGGCC ATTATCCTCC 50
CTTCCCATAT CCGATGACAG GCAAGACCCA GATCCAGTCC GTGGAACCAT 100
TACCAAGCA GCAGCTGAAC AACATGTCGT TTGCTGAAAT CATCATGGGC 150
TATAAGATCA TGATGCTAC CAACATCCTC GTGTCTCCGC TGGTTTATCT 200
CTACCCGGAC ATTCCTAAGG AGGAGGCGTT TGGAAAGTAT TGTCGACCAG 250
AAAGCCAGGA GCATCCTGAA GCTGACCCAG GTAGTTGTTG ATTTTCCACG 300
TTGGGCACTT TTTCTGGGAA AAAATGGGAA ATTGCAGGAT TCTTGGAGGA 350
TAGGTAGGTC ACTGCCCAA GAGCCTGGTG ACCTTTATT 389
```

*STAT5B* signal transducer and activator of transcription 5B [ *Felis catus* (domestic cat)], Gene ID: 101090663, updated on 12-Feb-2020

```
> feline STAT5B DNA (wild type) - chrE1:42844241 - 42844617
CTGTGGTTAA TTTTAAATGG AGATCTTTAT TGGGACAGTT TTAACGGAGA 50
GTCTTTAATT TGTCAGCATG TTGGATTTT TAACATTTCC TGTCAGAAA 100
TCATGTTTAG AATACGATTA TTCTGTTTGT CGCTCTAGAG GAAAGGATGT 150
TTTGGAATCT GATGCCTTTT ACCACCAGAG ACTTCTCCAT CCGGTCCCTG 200
GCTGACCGCT TAGGGGACCT GAATTACCTT ATCTACGTGT TTCCTGATCG 250
GCCAAAAGAT GAAGTGACT CCAAATACTA CACACCAGTC CCATGCGAGC 300
CTGCCACTGG TAACAATGTT CGCATTCTGA TCTGGTTTGT TTGCGATTTG 350
AGTTTTCTTT TGGTTTTTGT GTGGGTG 377
```

```
> feline STAT5B DNA (incl. SNP)- chrE1:42844241 - 42844617
CTGTGGTTAA TTTTAAATGG AGATCTTTAT TGGGACAGTT TTAACGGAGA 50
GTCTTTAATT TGTCAGCATG TTGGATTTT TAACATTTCC TGTCAGAAA 100
TCATGTTTAG AATACGATTA TTCTGTTTGT CGCTCTAGAG GAAAGGATGT 150
TTTGGAATCT GATGCCTTTT ACCACCAGAG ACTTCTCCAT CCGGTCCCTG 200
GCTGACCGCT TAGGGGACCT GAATTACCTT ATCTACGTGT TTCCTGATCG 250
GCCAAAAGAT GAAGTGACT CCAAATACTA CACACCAGTC CCATGCGAGC 300
CTGCCACTGG TAACAATGTT CGCATTCTGA TCTGGTTTGT TTGCGATTTG 350
AGTTTTCTTT TGGTTTTTGT GTGGGTG 377
```
